# Supplementary material for: Genome-Wide Identification and Expression Analysis of Hsf and Hsp Gene Families in Cucumber (Cucumis Sativus L.)
Source: Research Square preprint supplement (doi:10.21203/rs.3.rs-189743/v1), 2021-02-15
Supplement: Supplementary file 1 [file 4d5868407114e1cb9b2b8f7a.xlsx]

## Sheet: CsHsf
Table S1-1. Features of CsHsf genes in cucumber.
Name	Gene ID	Type	Chr.	Genomic Location	ORF	Exon	AA	MW (kDa)	pI	NLS	NES	AHA
CsHsf-1	CsaV3_1G024170	C1	1	13663460 - 13666158 (+)	876	2	291	33.2687	5.21	(185) AEKKRRLMIS	(128) LRKEQRALEEQL
CsHsf-2	CsaV3_1G033050	A4	1	20072867 - 20075352 (+)	1230	2	409	46.6844	5.2	(204) PERKRRLPRV	(140) LDKEQLLLEL	(354) DVFWQQFLTE
CsHsf-3	CsaV3_1G043540	B4	1	28539621 - 28541550 (-)	774	2	257	29.8838	8.35
CsHsf-4	CsaV3_2G001400	A9	2	350357 - 352415 (-)	1176	3	391	45.2533	5.85
CsHsf-5	CsaV3_2G002270	C1	2	893155 - 894524 (-)	915	2	304	34.2477	6.15	(184) LPSKRRRVVM	(128) LKREQRALEL
CsHsf-6	CsaV3_2G013880	A7	2	11421298 - 11424176 (-)	1050	2	349	40.1925	5.78	(127) RTIKRRKPPT (236) STKKRRRPID	(278) LEALALEMQGL	(324) EGFWEEFFSG
CsHsf-7	CsaV3_2G025510	A2	2	17542329 - 17543717 (-)	1095	2	364	41.5356	5.12	(128) LLRTIKRRRHS (236) EIGRKRRLTAS
CsHsf-8	CsaV3_2G026600	B4	2	18190063 - 18192001 (+)	1125	2	374	41.6857	7.28	(325) ISSSKKRMHPD	(358) LEKGDNLGL
CsHsf-9	CsaV3_3G001500	A1	3	1154596 - 1159734 (-)	1557	2	518	56.9994	5.04	(236) EANKKRRLKQD		(470) SNFWDDLLVQ
CsHsf-10	CsaV3_3G010690	A5	3	8504904 - 8508856 (+)	1404	2	467	52.3941	6.33	(205) AFKKKRRLP	(163) LTV	(443) DVFWERLLTE
CsHsf-11	CsaV3_3G012910	A6	3	9871823 - 9874637 (-)	1092	3	363	42.5444	5.48	(232) INRKRRRHID		(319) EGFWENLLNE
CsHsf-12	CsaV3_3G016950	B2	3	12743761 - 12744742 (-)	882	2	293	33.3184	5.56
CsHsf-13	CsaV3_3G036820	A3	3	30491616 - 30495660 (+)	1683	2	560	62.2906	5.09	(323) SRTKRRFVKQ
CsHsf-14	CsaV3_3G040700	B3	3	33371076 - 33373029 (-)	759	2	252	29.4638	9.1	(117) WTNKRKHNS (231) KQNKRKRSNY	(220) LEVEEEDEMEI
CsHsf-15	CsaV3_4G011850	B3	4	8947070 - 8949967 (+)	726	2	241	28.2379	9.39	(127) RRRKKWRNK
CsHsf-16	CsaV3_4G034470	B4	4	24404244 - 24406433 (-)	990	2	329	37.9403	7.35	(289) QSKKRLHPEY	(314) LEKDDLGLNL
CsHsf-17	CsaV3_5G003160	B2	5	1968211 - 1972957 (+)	876	12	729	80.76	5.53	(667) VSIGMKRMRREIE
CsHsf-18	CsaV3_5G014520	A8	5	11518997 - 11524654 (+)	870	3	289	33.4222	6.11		(170) LRERL
CsHsf-19	CsaV3_6G015610	A4	6	11576543 - 11577833 (-)	903	2	300	34.7574	7.78	(191) EHRKKRKIGKVNEF	(230) LGKLELSL	(278) DVFWEHFLTE
CsHsf-20	CsaV3_6G043240	B1	6	25449530 - 25454039 ( -)	873	2	290	32.6956	5.72
CsHsf-21	CsaV3_6G050100	B5	6	29215771 - 29216836 (-)	594	2	197	23.0398	5.94		(183) LHI
CsHsf-22	CsaV3_6G051120	A4	6	29767171 - 29771382 ( -)	1221	2	406	47.4787	5.92	(204) HDRKRRLTTV		(350) DVFWEQFLTE
CsHsf-23	CsaV3_7G027860	A7	7	17491759 - 17493282 (+)	1113	2	370	42.6457	5.13	(126) LLKNIKRRRTTSY (241) ITKKRRRPIE	(290) LEALALEMQGL	(343) EGFWEELFSE

## Sheet: CsHsp20
Table S1-2. Features of CsHsp20 genes in cucumber.
Name	Gene ID	Chr.	Genomic Location	ORF	Exon	AA	MW (kDa)	pI	WoLF PSORT Prediction
CsHsp20-1	CsaV3_1G005060	1	3382876 - 3383465 (+)	507	2	168	18.8	9.46	golg: 5, cyto: 4, nucl: 2, mito: 1, vacu: 1
CsHsp20-2	CsaV3_1G010860	1	6744164 - 6745308 (+)	384	2	127	14.4	7.07	cyto: 7, extr: 3, nucl: 2, plas: 1
CsHsp20-3	CsaV3_1G035810	1	21892088 - 21894018 (-)	447	1	148	16.5	4.51	cyto: 9, nucl: 3, plas: 1
CsHsp20-4	CsaV3_1G035820	1	21895476 - 21896585 (-)	483	1	160	18.2	6.13	cyto: 14
CsHsp20-5	CsaV3_1G035830	1	21898380 - 21898862 (+)	408	2	135	15.4	6.21	cyto: 14
CsHsp20-6	CsaV3_1G041730	1	26648261 - 26650808 (-)	1488	2	495	54.1	9.39	nucl: 9, cyto: 2.5, cyto_pero: 2, mito: 1
CsHsp20-7	CsaV3_1G041750	1	26652841 - 26654260 (-)	1071	2	356	39.9	9.21	nucl: 11, cyto: 1, mito: 1
CsHsp20-8	CsaV3_1G041760	1	26658938 - 26660854 (-)	1068	2	355	39.6	9.45	nucl: 7, plas: 2, golg: 2, mito: 1, E.R.: 1
CsHsp20-9	CsaV3_3G002770	3	2251829 - 2254144 (+)	639	2	212	23.8	5.43	chlo: 7, mito: 7
CsHsp20-10	CsaV3_3G002780	3	2255195 - 2257043 (+)	639	2	212	23.8	5.26	chlo: 9, mito: 3, vacu: 2
CsHsp20-11	CsaV3_3G005420	3	4551319 - 4554535 (+)	603	2	200	23	4.86	nucl: 9, nucl_plas: 6, chlo: 1, cyto: 1, extr: 1
CsHsp20-12	CsaV3_3G006720	3	5920734 - 5922774 (-)	798	2	265	30	7.74	E.R.: 4, cyto: 3, vacu: 3, golg: 2, nucl: 1
CsHsp20-13	CsaV3_3G027480	3	23792753 - 23793946 (+)	435	2	144	16.3	6.84	cyto: 14
CsHsp20-14	CsaV3_3G034390	3	29181040 - 29182090 (+)	603	1	200	23.7	8.34	cyto: 9, chlo: 3, nucl: 1
CsHsp20-15	CsaV3_3G034400	3	29183236 - 29183754 (+)	519	1	172	20.3	9.01	nucl: 6, cyto: 4, chlo: 2, plas: 2
CsHsp20-16	CsaV3_4G001560	4	880036 - 880668 (+)	633	1	210	24	5.49	chlo: 9, mito: 4
CsHsp20-17	CsaV3_4G017440	4	10885738 - 10886969 (-)	393	1	130	15	8.6	extr: 4, E.R.: 3, nucl: 2, mito: 2, vacu: 2
CsHsp20-18	CsaV3_4G025700	4	15114379 - 15114810 (-)	432	1	143	15.9	6.76	cyto: 11, chlo: 1, extr: 1
CsHsp20-19	CsaV3_4G035900	4	25245251 -25248160 (-)	972	2	323	36.1	7.69	cyto: 10, nucl: 4
CsHsp20-20	CsaV3_5G000040	5	35597 - 38762 (+)	690	2	229	25.5	9.12	chlo: 14
CsHsp20-21	CsaV3_5G008680	5	5339660 - 5344162 (-)	669	3	222	25	9.08	chlo: 13
CsHsp20-22	CsaV3_5G008690	5	5349881 - 5350786 (+)	459	1	152	17.4	9.27	cyto: 14
CsHsp20-23	CsaV3_5G008700	5	5360693 - 5363946 (-)	570	1	189	21.4	6.02	extr: 6, chlo: 4, cyto: 2, nucl: 1
CsHsp20-24	CsaV3_5G008750	5	5433169 - 5433777 (-)	609	1	202	23.4	9.55	chlo: 9, mito: 4
CsHsp20-25	CsaV3_5G008760	5	5435242 - 5437328 (-)	480	1	159	18.1	6.21	cyto: 12, nucl: 2
CsHsp20-26	CsaV3_5G008770	5	5435387 - 5435962 (+)	576	1	191	22.3	6.47	cysk: 12, extr: 1
CsHsp20-27	CsaV3_5G008780	5	5443251 - 5444088 (+)	471	1	156	17.8	5.97	cyto: 14
CsHsp20-28	CsaV3_5G030610	5	25114220 - 25116088 (+)	552	1	183	21.1	4.93	cyto: 5, nucl: 3, chlo: 2, mito: 1, vacu: 1, golg: 1
CsHsp20-29	CsaV3_5G035060	5	27756422 - 27758582 (-)	1059	2	352	38	4.94	mito: 7, chlo: 6
CsHsp20-30	CsaV3_6G001540	6	1008796 - 1012576 (+)	465	2	154	18	6.77	cyto: 9, chlo: 3, nucl: 1
CsHsp20-31	CsaV3_6G004450	6	3819433 - 3820802 (+)	462	2	153	17.8	9.37	cyto_nucl: 7, nucl: 6.5, mito: 2, plas: 1, pero: 1
CsHsp20-32	CsaV3_6G037900	6	21463616 - 21466526 (+)	741	6	246	27.1	7.6	nucl: 8, chlo: 3, cyto: 2
CsHsp20-33	CsaV3_7G008210	7	5140602 - 5141331 (-)	594	2	197	22.2	6.87	chlo: 11, vacu: 2

## Sheet: CsHsp60
Table S1-3. Features of CsHsp60 genes in cucumber.
Name	Gene ID	Chr.	Genomic Location	ORF	Exon	AA	MW (kDa)	pI	WoLF PSORT Prediction
CsHsp60-1	CsaV3_1G006990	1	4425616 - 4428136 (-)	1602	1	533	57.6	7.6	cyto: 5, chlo: 3.5, chlo_mito: 2.5, nucl: 2, pero: 2
CsHsp60-2	CsaV3_1G028890	1	15808217 - 15814329 (+)	1668	13	555	60.53	5.93	cyto: 10, pero: 2, chlo: 1
CsHsp60-3	CsaV3_1G041580	1	26498374 - 26504077 (+)	1827	13	608	64.79	5.86	cyto: 6, chlo: 5, mito: 2
CsHsp60-4	CsaV3_1G041990	1	26833443 - 26839901 (-)	1689	14	562	60.57	6.26	cyto: 6, chlo: 3, extr: 3, pero: 2
CsHsp60-5	CsaV3_1G046240	1	32064639 - 32070644 (-)	1548	9	515	55.21	5.76	cyto: 8, chlo: 4, extr: 1
CsHsp60-6	CsaV3_2G001340	2	313921 - 318338 (+)	1584	11	527	57.19	5.77	chlo: 6, cyto: 5, cysk: 2
CsHsp60-7	CsaV3_2G010520	2	7594703 - 7605724 (+)	1638	17	545	59.3	5.81	cyto: 10, chlo: 2, plas: 2
CsHsp60-8	CsaV3_2G012300	2	9854235 - 9858944 (+)	1728	18	575	61.21	5.85	mito: 12, chlo: 2
CsHsp60-9	CsaV3_2G025080	2	17295780 - 17301641 (+)	1608	9	535	59.23	5.52	cyto: 9, chlo: 2, nucl: 1, mito: 1
CsHsp60-10	CsaV3_3G043280	3	35122791 - 35134488 (+)	1638	13	545	58.85	5.44	cyto: 9, chlo: 3, mito: 1
CsHsp60-11	CsaV3_5G033630	5	26880403 - 26885051 (-)	1860	14	619	67.08	8.95	chlo: 13
CsHsp60-12	CsaV3_5G039190	5	30963947 - 30970587 (-)	1608	15	535	59.08	6.19	cyto: 10, chlo: 3
CsHsp60-13	CsaV3_6G014140	6	10284153 - 10287952 (+)	1752	8	583	61.44	5.06	chlo: 13
CsHsp60-14	CsaV3_7G025500	7	14954335 - 14959578 (+)	1719	18	572	61.06	5.79	mito: 11, chlo: 3
CsHsp60-15	CsaV3_7G034770	7	21986933 - 21992688 (-)	1713	17	570	60.7	6.05	mito: 13

## Sheet: CsHsp70
Table S1-4. Features of CsHsp70 genes in cucumber.
Name	Gene ID	Chr.	Genomic Location	ORF	Exon	AA	MW (kDa)	pI	WoLF PSORT Prediction
CsHsp70-1	CsaV3_2G009170	2	5673429 - 5675700 (+)	1953	2	650	71.2799	5.18	cyto: 12, chlo: 2
CsHsp70-2	CsaV3_2G011210	2	8444104 - 8448560 (+)	2124	8	707	75.3961	5.18	chlo: 14
CsHsp70-3	CsaV3_3G013380	3	10118261 -10119976 (-)	1716	1	571	61.9855	5.52	cyto: 6, chlo: 4, nucl: 1, mito: 1, plas: 1
CsHsp70-4	CsaV3_3G022450	3	19766345 - 19773388 (-)	2289	9	762	85.3914	5.63	nucl: 11, chlo: 1, cyto: 1
CsHsp70-5	CsaV3_4G014660	4	10111427 - 10120051 (-)	2043	6	680	73.1238	5.69	mito: 14
CsHsp70-6	CsaV3_4G024840	4	14570618 - 14574300 (+)	1944	2	647	70.8693	5.16	cyto: 8, cysk: 4, chlo: 1
CsHsp70-7	CsaV3_4G032260	4	22790290 - 22800785 (+)	2697	14	898	100.136	5.27	chlo: 5, nucl: 3, plas: 2, vacu: 2, E.R.: 2
CsHsp70-8	CsaV3_5G001960	5	1166017 - 1170448 (+)	1998	8	665	73.4291	5.1	E.R.: 8, extr: 2, vacu: 2, chlo: 1
CsHsp70-9	CsaV3_5G026450	5	21611631 - 21615410 (+)	1959	2	652	71.4538	5.1	cyto: 8, cysk: 4, chlo: 2
CsHsp70-10	CsaV3_5G026520	5	21670377 - 21673247 (-)	1947	2	648	71.0466	5.21	cyto: 8, cysk: 3, chlo: 1, nucl: 1
CsHsp70-11	CsaV3_7G024760	7	14011638 - 14016863 (+)	2034	7	677	72.8323	5	chlo: 9, mito: 4
CsHsp70-12	CsaV3_7G033150	7	20922786 -20931050 (-)	2532	9	843	92.8991	5.4	chlo: 7, cyto: 4, cysk: 2

## Sheet: CsHsp90
Table S1-5. Features of CsHsp90 genes in cucumber.
Name	Gene ID	Chr.	Genomic Location	ORF	Exon	AA	MW (kDa)	pI	WoLF PSORT Prediction
CsHsp90-1	CsaV3_1G038690	1	24375480 -24379881 (-)	2100	3	699	79.9	4.99	cyto: 9, nucl: 3, chlo: 1
CsHsp90-2	CsaV3_1G038710	1	24388218 -24391475 (+)	2100	3	699	79.9	4.99	cyto: 8, nucl: 3, chlo: 2
CsHsp90-3	CsaV3_2G029630	2	19398943 -19404891 (+)	2454	15	817	93.6	4.89	E.R.: 5, chlo: 1, mito: 1, plas: 1
CsHsp90-4	CsaV3_3G017480	3	13094503 - 13098153 (+)	2112	4	703	80.9	4.97	cyto: 9, nucl: 3, chlo: 2
CsHsp90-5	CsaV3_5G018740	5	14287114 -14293595 (+)	2400	19	799	90.4	4.88	chlo: 11, nucl: 1, plas: 1
CsHsp90-6	CsaV3_6G009480	6	7636800 -7644606 (-)	2376	20	791	89.5	5.47	mito: 8, chlo: 5

## Sheet: CsHsp100 
Table S1-6. Features of CsHsp100 genes in cucumber.
Name	Gene ID	Chr.	Genomic Location	ORF	Exon	AA	MW (kDa)	pI	WoLF PSORT Prediction
CsHsp100-1	CsaV3_1G000100	1	80792 - 90944 (+)	2772	9	923	102.5	6.98	chlo: 12, mito: 2
CsHsp100-2	CsaV3_1G002820	1	1778618 - 1781828 (+)	2205	6	734	82.74	6.26	cyto: 8, chlo: 3, nucl: 3
CsHsp100-3	CsaV3_1G005900	1	3780760 - 3791714 (+)	4659	17	1552	175.15	5	nucl: 6, cyto: 6, chlo: 1
CsHsp100-4	CsaV3_1G033930	1	21099244 - 21106112 (-)	2775	9	924	102.29	6.5	chlo: 12, cyto: 1
CsHsp100-5	CsaV3_3G026720	3	22957501 - 22966150 (+)	2922	10	973	109.3	6.26	chlo: 12, mito: 2
CsHsp100-6	CsaV3_4G036670	4	25785108 - 25790814 (+)	2952	10	983	109.93	7.01	mito: 7.5, chlo_mito: 7.5, chlo: 6.5
