# Supplementary material for: Genome-Wide Identification and Expression Analysis of Hsf and Hsp Gene Families in Cucumber (Cucumis Sativus L.)
Source: Research Square preprint supplement (doi:10.21203/rs.3.rs-189743/v1), 2021-02-15
Supplement: Supplementary file 2 [file e44b80731ad90ce68c19e286.xlsx]

## Sheet: CsHsf
Table S2-1. List of the putative motifs of CsHsf proteins.
Motif	Width	Best possible match
1	50	PKYFKHNNFSSFVRQLNTYGFRKIDPDRWEFANEGFLRGQKHLLKNIHRR
2	41	PFLTKTYEMVDDPSTDHIVSWSSSGTSFIVWDPPEFSRDLL
3	50	LMQELVKLRQQQQTTRLQLQTMEQRLQGTEQPQQQMMSFLAKAVQNPEFL
4	39	YTALTEENERLRRENGMLSSELAQMKKLCNDILYLVQNY
5	24	GACVEVGRFGLEDEIERLKRDKQV
6	15	NDVFWEQLLTERPGE
7	13	PQPMEGLHDVGPP
8	15	KTKLFGVAIGGKRRR
9	7	KPIHSHS
10	6	YHHHHT

## Sheet: CsHsp20
Table S2-2. List of the putative motifs of CsHsp20 proteins.
Motif	Width	Best possible match
1	21	AKVDEIKAEMENGVLTVTVPK
2	15	WKETPDAHVFKADLP
3	28	GIKKEEVKVEVEEGRVLQISGERSKEQE
4	15	RSSGKFMRRFRLPEN
5	21	MSLIPSFFGGRRSNVFDPFSL
6	8	NEKWHRIE
7	29	DVWDPFSGFRFSNSLANLPSSAMETSALA
8	50	GEESGRLRRREGYKQVIDVVVKELRTNMVTLALGIAAFVVLYLNLSKNGH
9	47	KPSATSSNIPPVQQPKPKAQSQPPPAATKPTADPPTVRPNAPKSQNE
10	21	GLSKDDVKVEVEDNTLLIKGE

## Sheet: CsHsp60
Table S2-3. List of the putative motifs of CsHsp60 proteins.
Motif	Width	Best possible match
1	29	NPGAKLVVEVAKAQNDEAGDGTTTVVVLA
2	50	VGREGVITIEDGKSLENELEVVEGMKLDRGYISPYFITNQKKQKVELENP
3	50	AEDVESEALATLIVNKLRGGLKVAAIKAPGFGERRKAYLQDIAILTGAEV
4	21	VKALADAVKTTLGPKGRNKML
5	31	CTIGYRGATDEYLDEVERGIHDPLKVBRCAL
6	41	VGAATEAELGERKLRVEDALNATKAAVEEGIVPGGGVALLH
7	21	DSYGSPKVTNDGVTILKEIEV
8	21	YDKEKLQERLAKLSGGVAVIK
9	27	NGEQKLGVEIFQRALSVPPKTIASNAG
10	21	GEKLVASGIHPVVLIRGYEKA

## Sheet: CsHsp70
Table S2-4. List of the putative motifs of CsHsp70 proteins.
Motif	Width	Best possible match
1	50	VKNAVVTVPAYFNDSQRQATKDAGVIAGLNVLRIINEPTAAALAYGLDKK
2	50	PLSLGLETAGGVMTVLIPRNTTIPTKKEQVFSTYSDNQTGVLIQVYEGER
3	50	TRARFEELNSDLFEKCMEPVEKCLRDAKLDKSNIHEVVLVGGSTRIPKVQ
4	50	LGKFELSGIPPAPRGVPQITVCFDIDANGILNVSAEDKTTGKKNKITITN
5	41	VIGIDLGTTYSCVAVWQGDRVEIIANDQGNRTTPSYVAFTD
6	50	AGDTHLGGEDFDNRLVNHFVQEFKRKHKKDISKNPRALRRLRTACERAKR
7	31	RLIGDAAKNQVAMNPENTVFDVKRLIGRRFS
8	29	FNGKEPCKSINPDEAVAYGAAVQAAILSG
9	29	NVLIFDLGGGTFDVSLLTIEEGVFEVKAT
10	29	YKGEGKQFAPEEISAMVLTKMKEIAEAYL

## Sheet: CsHsp90
Table S2-5. List of the putative motifs of CsHsp90 proteins.
Motif	Width	Best possible match
1	50	DSPCVLVTGKYGWTANMERIMKAQALSDNSMAGYMSSKRTMEINPENDIM
2	50	TETFEFQAEVSRLLSLIINTLYSNKEIFLRELISNSSDALDKIRFLSLTD
3	38	ELIPEYLGFVKGVVDSDDLPLNVSREMLQQNKILKVIR
4	50	KLGIIEDSQARPRIAPLLRFVSTKSGDELTSLKDYVTRMKEGQKDIYYIT
5	50	QPELFIRIKPDKANGTLSIIDSGIGMTKADLVNNLGTIARSGTKEFMEAL
6	36	HEWELVNKQKPIWMRKPKEVTKEEVAEFVKSLTNDW
7	29	DVSMIGQFGVGFVSAYLVAEKVIVTTKHN
8	35	EVLEERRLKDLVKKYSEFISVPIYLWVEKTIEKEV
9	50	ENSPFLEKLKKKGYEVLFMVDPIDEYAVQQLKEYEGKKLVSATKEGLKLG
10	29	PLAVKHFSVEGQVEFKVILFVPKRAPFDL

## Sheet: CsHsp100 
Table S2-6. List of the putative motifs of CsHsp100 proteins.
Motif	Width	Best possible match
1	50	MSEYMEKHTVSRLIGSPPGYVGYEEGGQLTEAVRRRPYTVVLFDEIEKAH
2	50	PCIGATTLDEYRKYIEKDPALERRFQQVYVPEPSVEDTISILRGLRERYE
3	50	GKLDPYIGRDDEIRRVTQILSRRTKNNPVLIGEPGVGKTAIAEGLAQRIV
4	50	HKRVVGQDEAEKSVARAIRRSRAGLSNPNRPIASFMFSGPTGVGKTELAK
5	41	DVFNMLLQILDDGRLTDKQGRTVDFTNTVLIMTSNVGSSYI
6	50	HHGVRITDSALVAAAQLSYRYITGRFLPDKAIDLVDEAGARVRVRLTSQP
7	36	IILFIDEIHTVVGAGATEGAMDAANLLKPMLARGEL
8	41	GDVPETIEGRRLITLDMGLVAGTKYRGEFEERLKAVMKEV
9	50	QYFRPEFLNRLDEYIVFRPLTKLQVSKIARLQLKRVFDRLKEKGIDLQVT
10	49	ALDRVVDEGYDPVYGARPVRRWIQRLVETEIAKMMLKREIKEGDTVIVD
